# Supplementary material
Source: PubMed Central journal article supplement (PMC8709733)

**Figure 1.**

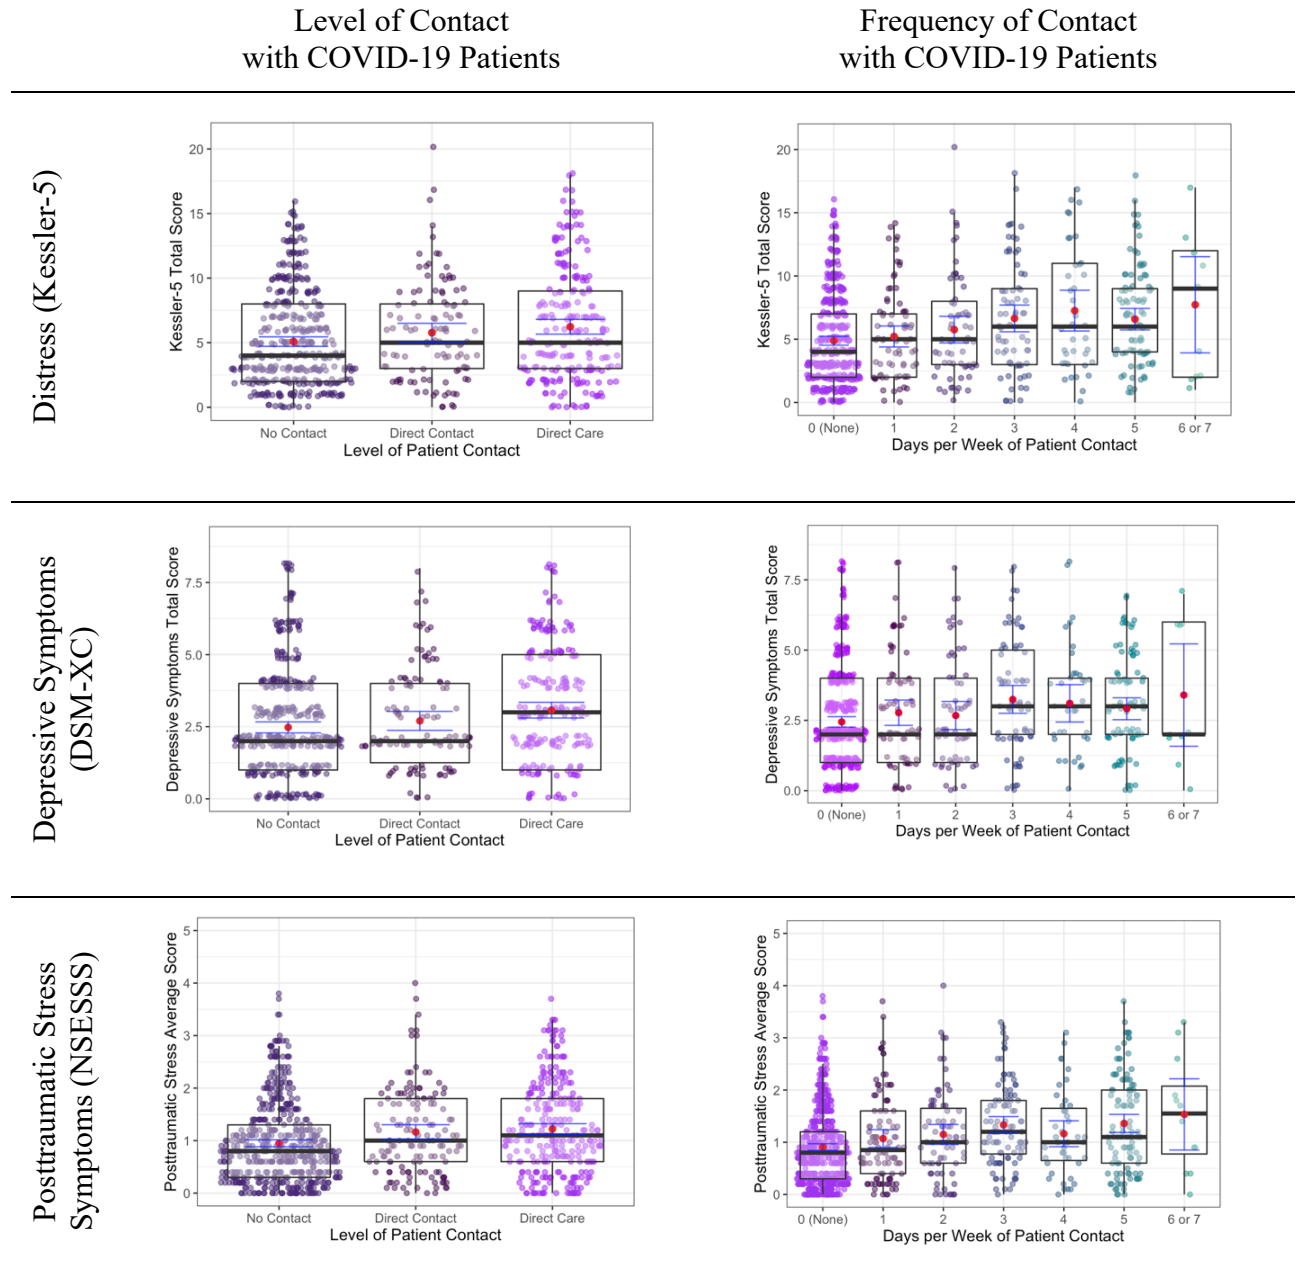

Supplement: mmc1.pdf [file mmc1.pdf]
